# Supplementary material for: Metabolomics Analysis Provides New Insights Into the Molecular Mechanisms of Parasitic Plant Dodder Elongation in vitro
Source: Frontiers journal article supplement (doi:10.3389/fpls.2022.921245), 2022-06-20
Supplement: Data_Sheet_1.zip [file Data_Sheet_1.zip]

**
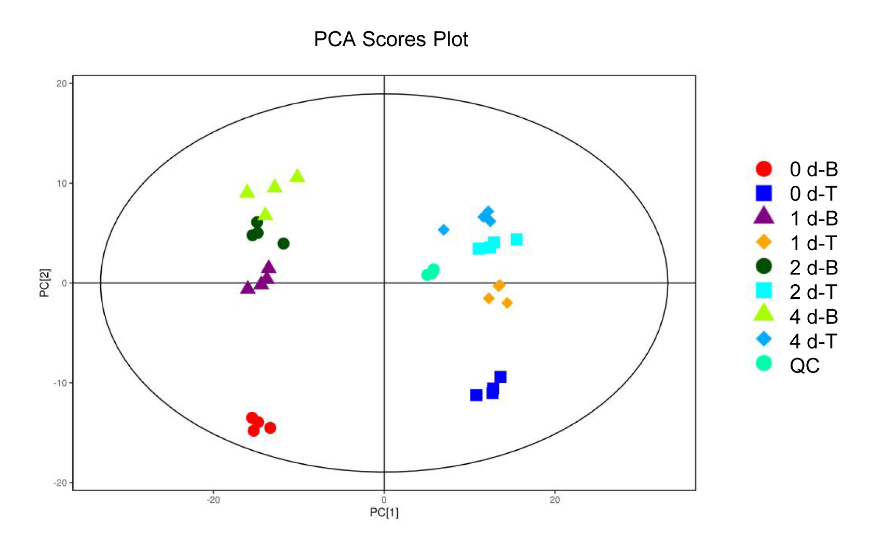
Supplementary Figure S1.** PCA plot showing the metabolomic trajectory of the detached dodder shoots growth at 0 d, 1 d, 2 d and 4 d (B: basal stems; T: shoot tips)*.* QC, quality control samples.


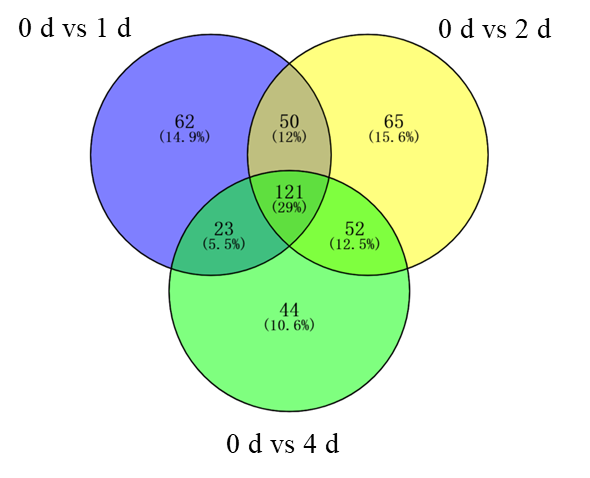


**Supplementary Figure S2.** Venn diagram of metabolites in the basal stems among 0 d vs 1 d, 0 d vs 2 d, 0 d vs 4 d.


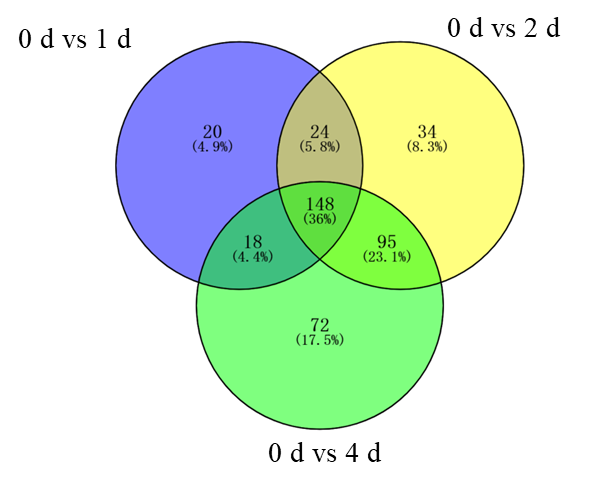


**Supplementary Figure S3.** Venn diagram of metabolites in the shoot tips among 0 d vs 1 d, 0 d vs 2 d, 0 d vs 4 d.
